# Supplementary material for: Characterization and assessment of HBV chronically infected patients: Identification of those eligible for treatment in the South West region of Cameroon
Source: PubMed Central journal article supplement (PMC6124766; doi:10.1371/journal.pone.0203312), 2018-09-05
Supplement: pone.0203312.s001.pdf [file pone.0203312.s001.pdf]

**RESEARCH QUESTIONNAIRE**

Virologic, serologic, hematologic and biochemical characterization of hepatitis B virus infection in North West and South West regions of Cameroon: transmission risk and immune responses in the subjects

**PATIENT IDENTIFICATION:** Index case  Sexual Partner  Household contact  Healthcare worker  Healthy control

1. Participant code: \_\_\_\_\_ Partner N°: \_\_\_\_\_ Date of collection: \_\_\_\_\_  
Address: \_\_\_\_\_ Tel: \_\_\_\_\_

**DEMOGRAPHIC/SOCIO-ECONOMIC STATUS**

2. Date of birth: \_\_\_\_\_ OR Age: \_\_\_\_\_ Ethnic Origin: \_\_\_\_\_  
3. Religion: Muslim  Christians  If Christian which dominion? Catholic  Protestant  Revival   
4. Gender (tick one box only): Male  Female  If female: are you pregnant? No  Yes   
5. Occupation: \_\_\_\_\_ Civil servant  Employed in private the sector  Self employed   
6. Monthly Income: < 50,000F  50,000-100,000F  >100,000F  None   
7. Level of Education: Did not go to school  Primary  Secondary  Post-secondary   
8. Marital status: Single  Currently married  Previously married (Divorced/widowed)   
9. If "currently married", type of marriage: Monogamy  Polygamy

**KNOWLEGDE ON HEPATITIS B/ VACCINE STATUS**

10. Have you heard about Hepatitis B before? Yes  No   
11. How is Hepatitis B transmitted? Through drinking water/food  Via contact with infected body fluids  Having unprotected sex with an infected person   
Airborne  By sharing cups and plates with an infected person  Through blood transfusion with an infected blood  By sharing blades and other sharp objects with an infected person   
13. How can Hepatitis B be prevented? By taking the vaccine  By always covering the mouth before coughing  By having protected sex  By keeping the environment clean   
14. Have you been vaccinated for Hepatitis B? Yes  No  Never heard of HBV vaccine  If No, why? \_\_\_\_\_  
15. If yes, how many doses did you receive? \_\_\_\_\_ Don't know   
16. Have you been tested for Hepatitis? Yes  No  If yes which of the hepatitis? HBV  HCV   
17. Reasons for being tested for Hepatitis: Voluntary  Administrative  Antenatal  STI consultation   
Confirmation  Routine  Blood donation  Signs and symptoms \_\_\_\_\_  
18. What were the results? **HBV:** Positive  Negative  **HCV:** Positive  Negative  If "positive", at what age? \_\_\_\_\_  
19. If positive, are you on any treatment? Yes  No   
20. Type of treatment: traditional  antiviral  Immune boosters

**HEPATITIS/ RISK FACTORS**

18. Age at first sexual intercourse: \_\_\_\_\_ Gender of sexual partners: Men  Women  Both   
19. How often do you use condoms during sexual intercourse? Never  Rarely  Sometimes  Often  Usually   
20. How many sexual partners have you had in the last 12 months? \_\_\_\_\_ How many sexual partners have you had in your lifetime? \_\_\_\_\_ Do you know the status of your partner? \_\_\_\_\_ What is it? \_\_\_\_\_  
18. Have you ever been diagnosed with a sexually transmitted disease in the past? Yes  No   
19. Have you ever used injection drugs? Yes  No  If yes, for how long did you use injection drugs? \_\_\_\_\_  
20. Do you currently use injection drugs? Yes  No  If yes, about how many times over the past month: \_\_\_\_\_  
21. Have you had known contact with an individual with Hepatitis B or C? Yes  No   
22. If yes, were they: Sexual partner  Household member  Occupational contact  Injection drug user   
What is the nature of your relationship with household member (s) \_\_\_\_\_  
23. Have you ever had a blood transfusion? Yes  No  If yes, how long ago? \_\_\_\_\_  
24. Do you have a tatoo on your body? Yes  No

25. Do you usually ensure that the barber disinfects his shaving machine before using it on you? Yes  No
26. Nature of Secondary school attended: Boarding  Days school  Both
27. Have you been incarcerated before? Yes  No  If "yes" for how long? \_\_\_\_\_
28. Do you currently smoke? Yes  No  or ex-smoker  If "Yes" for how long have been smoking? \_\_\_\_\_
29. How many stick of cigarette do you smoke per day? \_\_\_\_\_ Do you smoke substances other than cigarette? Yes  No
30. Do you currently consume alcohol? Yes  No  Ex-alcohol consumer
31. **Alcohol use disorder identification (AUDIT):** Place a tick in the box that best describe your answer to the question (**alcohol consumers only**)

| Questions                                                                                                                         | 0      | 1                 | 3                    | 3                   | 4                      | score |
|-----------------------------------------------------------------------------------------------------------------------------------|--------|-------------------|----------------------|---------------------|------------------------|-------|
| How often do you have a drinks containing alcohol?                                                                                | Never  | Monthly or less   | 2 to 4 times a month | 2 to 3 times a week | 4 or more times a week |       |
| How many drinks do have containing alcohol on a typical day you are drinking?                                                     | 1 or 2 | 3 or 4            | 5 or 6               | 7 to 9              | 10 or more             |       |
| How often do you have 5 or more alcoholic drinks on one occasion?                                                                 | Never  | Less than monthly | Monthly              | Weekly              | Daily or almost daily  |       |
| How often during the last year, have you found that you were able to stop drinking once you started?                              | Never  | Less than monthly | Monthly              | Weekly              | Daily or almost daily  |       |
| How often during the last year, have you failed to do what was normally expected of you because of drinking?                      | Never  | Less than monthly | monthly              | Weekly              | Daily or almost daily  |       |
| How often during the last year have you needed a first drink in the morning to get yourself going after a heavy drinking session? | Never  | Less than monthly | Monthly              | Weekly              | Daily or almost daily  |       |
| How often during the last year, have you had a feeling of guilt or remorse after drinking?                                        | Never  | Less than monthly | Monthly              | Weekly              | Daily or almost daily  |       |
| How often during the last year, have you been unable to remember what happened the night before because of your drinking?         | never  | Less than monthly | Monthly              | Weekly              | Daily or almost daily  |       |
| Have you or someone else been injured because of your drinking?                                                                   | Never  | Less than monthly | Monthly              | Weekly              | Daily or almost daily  |       |
| Has a relative, friend, doctor or other health care worker been concerned about your drinking or suggested you cut down?          | never  | Less than monthly | Monthly              | Weekly              | Daily or almost daily  |       |
| <b>Total score</b>                                                                                                                |        |                   |                      |                     |                        |       |

Conclusion: Hazardous drinking (**score ≥ 8**)  non-hazardous drinking (**score less than < 8**)

32. Other comorbidities: Diabetes  Hypertensive  Liver diseases  Kidney disease

33. For how long have you been suffering from this other comorbidities? \_\_\_\_\_

### CLINICAL EVALUATION

#### At enrollment

Transaminases level (IU/ml) AST: \_\_\_\_\_ ALT level: \_\_\_\_\_ AST/ALT ratio \_\_\_\_\_ APRI score \_\_\_\_\_

HBV profile panel: HBsAG \_\_\_\_\_ HBsAb \_\_\_\_\_ HBeAg \_\_\_\_\_ HBeAb \_\_\_\_\_ HBV total core Ab: \_\_\_\_\_

HBV DNA level: \_\_\_\_\_ (copies/mL) HBV genotype: \_\_\_\_\_ Age platelet ratio \_\_\_\_\_

Mass: \_\_\_\_\_ Height \_\_\_\_\_ Signs and symptoms: \_\_\_\_\_

#### At follow-up

Transaminases level (IU/ml) AST: \_\_\_\_\_ ALT level: \_\_\_\_\_ AST/ALT ratio \_\_\_\_\_ APRI score \_\_\_\_\_

HBV profile panel: HBsAG \_\_\_\_\_ HBsAb \_\_\_\_\_ HBeAg \_\_\_\_\_ HBeAb \_\_\_\_\_ HBV total core Ab: \_\_\_\_\_

HBV DNA level: \_\_\_\_\_ (copies/mL) HBV genotype: \_\_\_\_\_ Age platelet ratio \_\_\_\_\_

Mass: \_\_\_\_\_ Height \_\_\_\_\_ Signs and symptoms: \_\_\_\_\_
